# Supplementary material
Source: PubMed Central journal article supplement (PMC8165014)
Supplement: NIHMS1688356-supplement-1.pdf [file NIHMS1688356-supplement-1.pdf]

## Negative Valence Systems

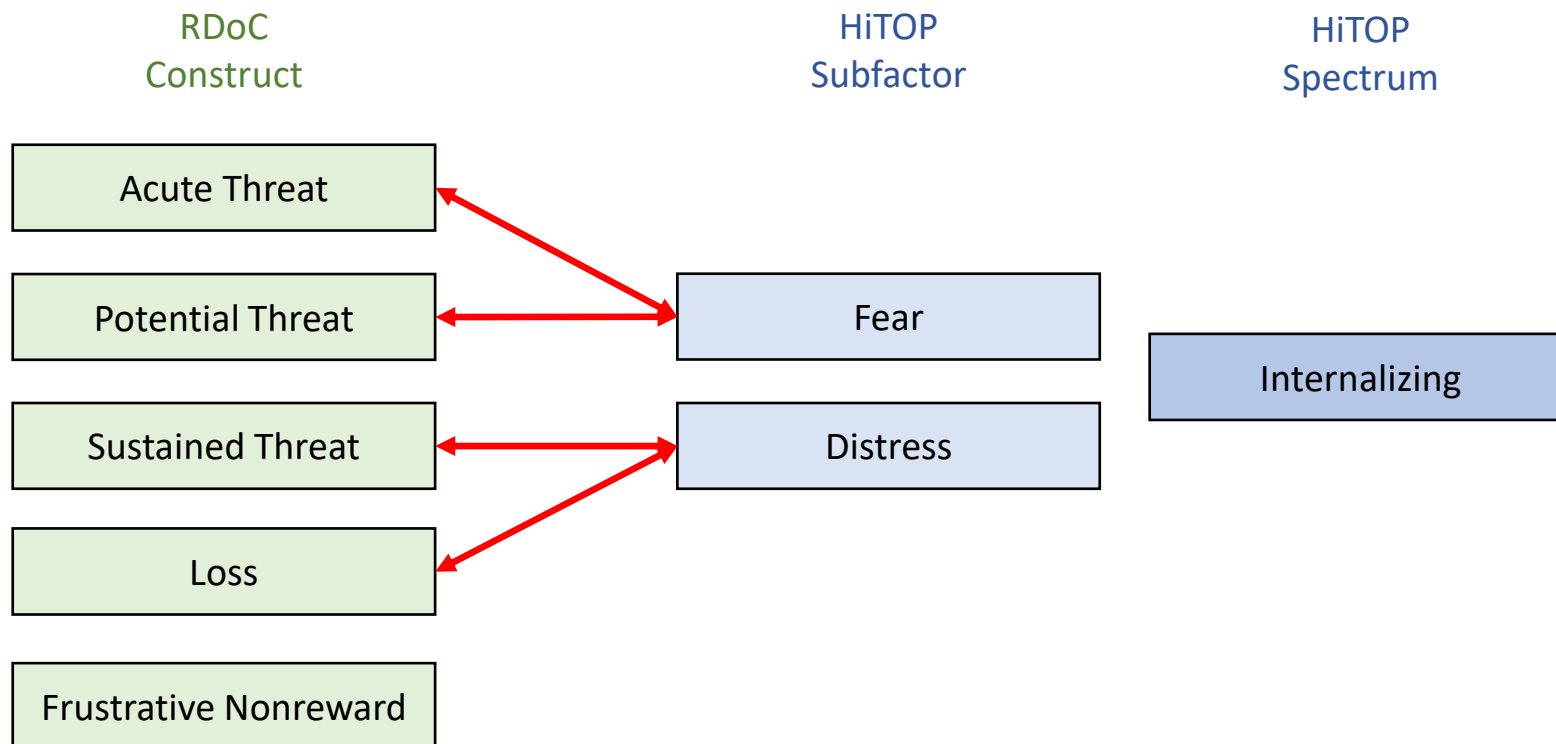

**Supplementary Figure 1. Top associations between the Research Domain Criteria (RDoC) Negative Valence Systems and the Hierarchical Taxonomy of Psychopathology (HiTOP).**

Notes: Arrows show the most consistent associations between each RDoC construct/subconstruct and HiTOP spectra/subfactors. Details of associations that require further research are given in text. Red arrow = positive association.

# Positive Valence Systems

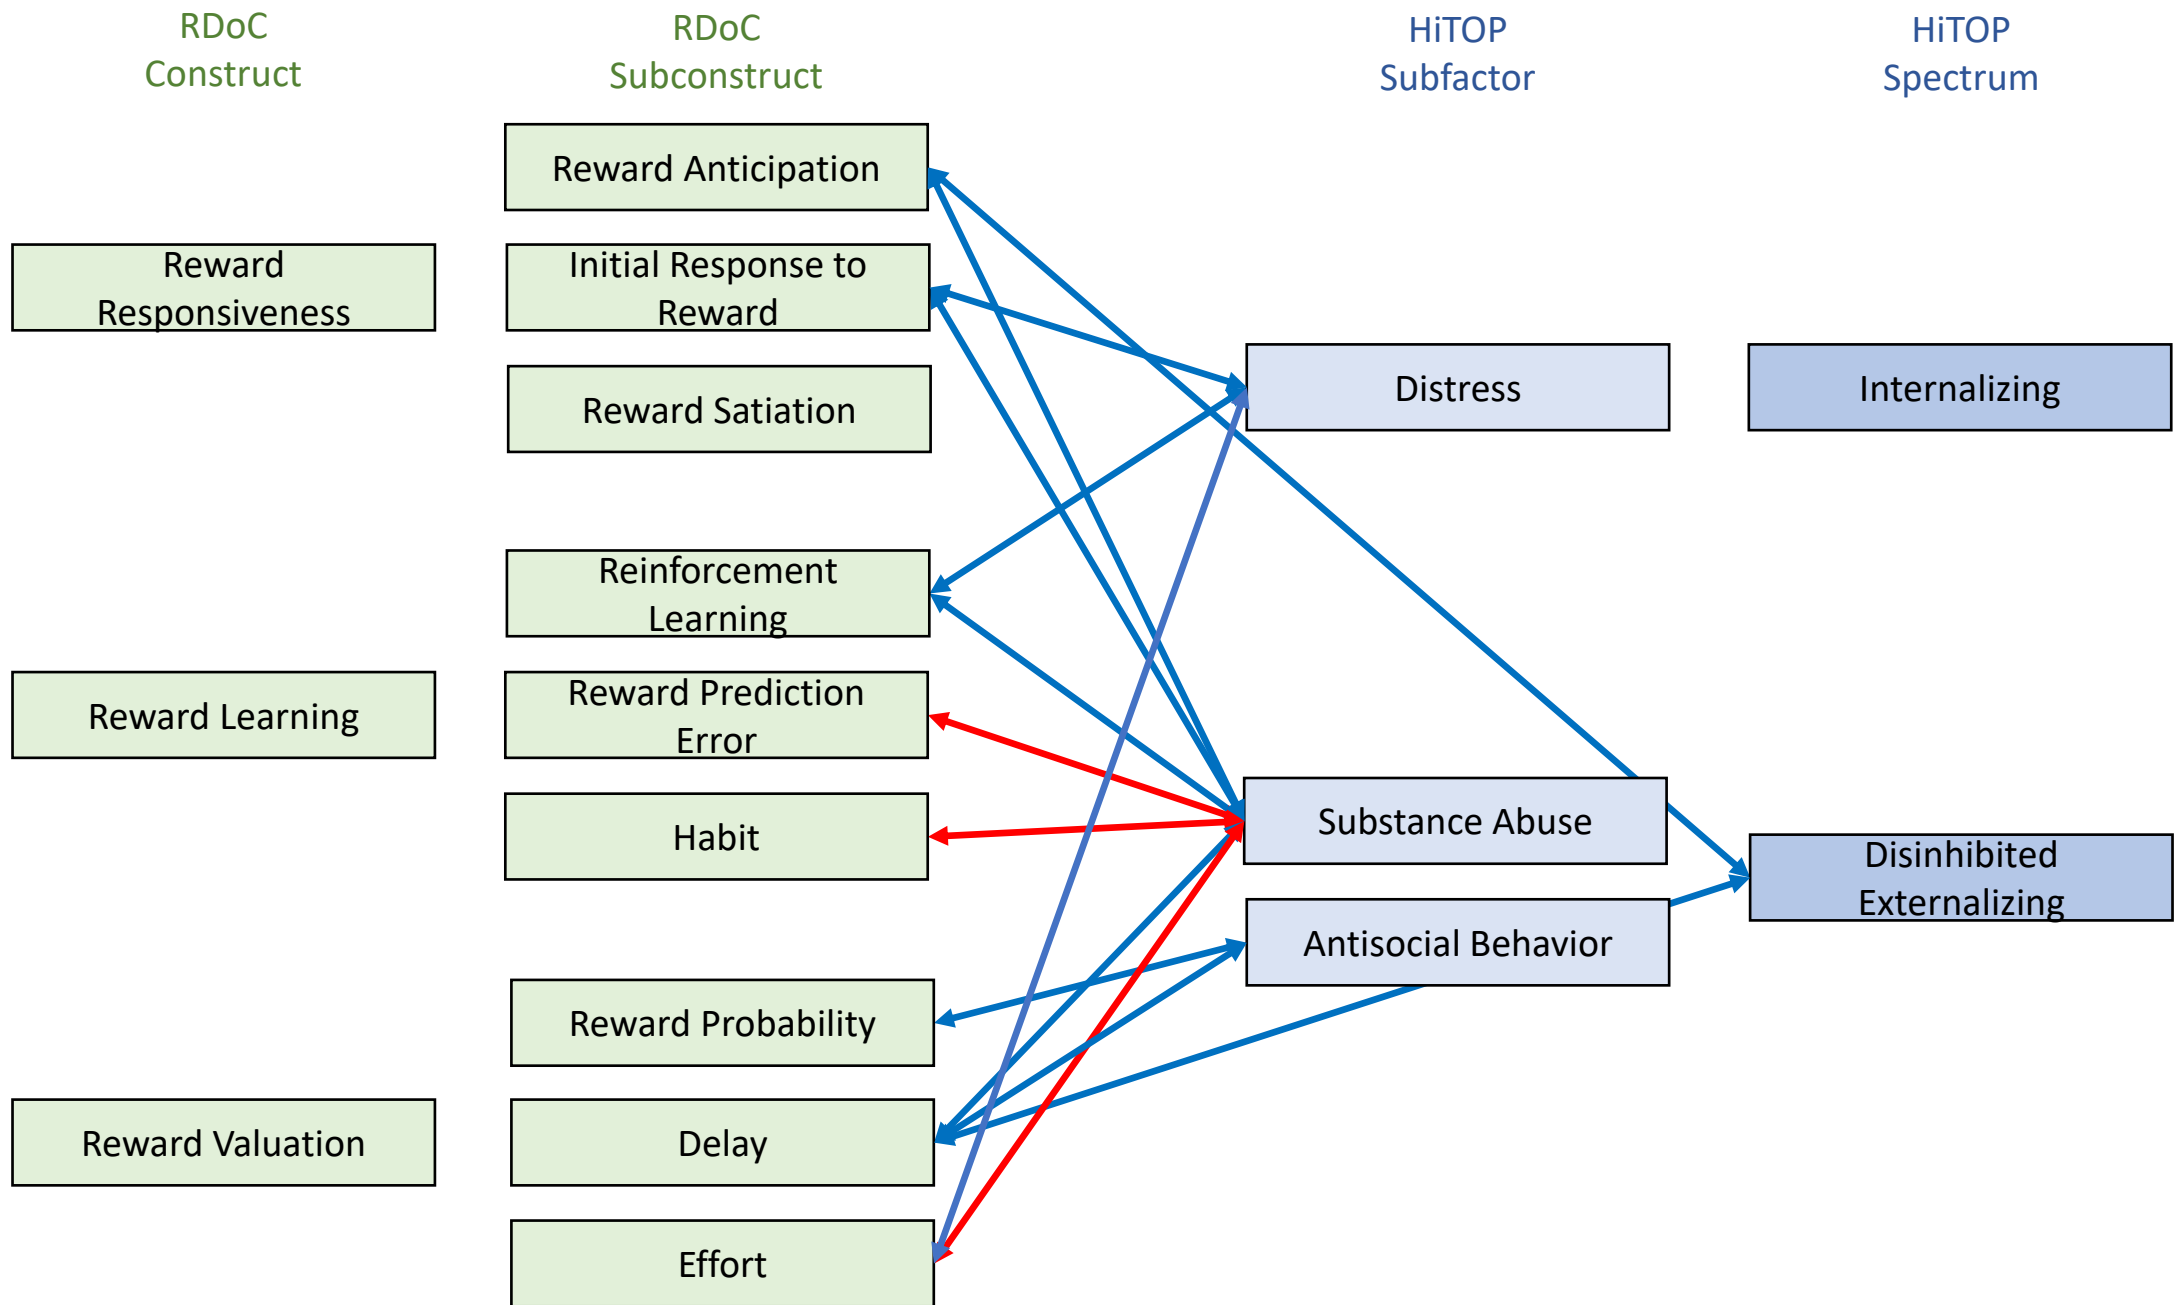

**Supplementary Figure 2. Top associations between the Research Domain Criteria (RDoC) Positive Valence Systems and the Hierarchical Taxonomy of Psychopathology (HiTOP).**

Notes: Arrows show the most consistent associations between each RDoC construct/subconstruct and HiTOP spectra/subfactors. Details of associations that require further research are given in text. Red arrow = positive association; Blue arrow = negative association.

# Cognitive Systems

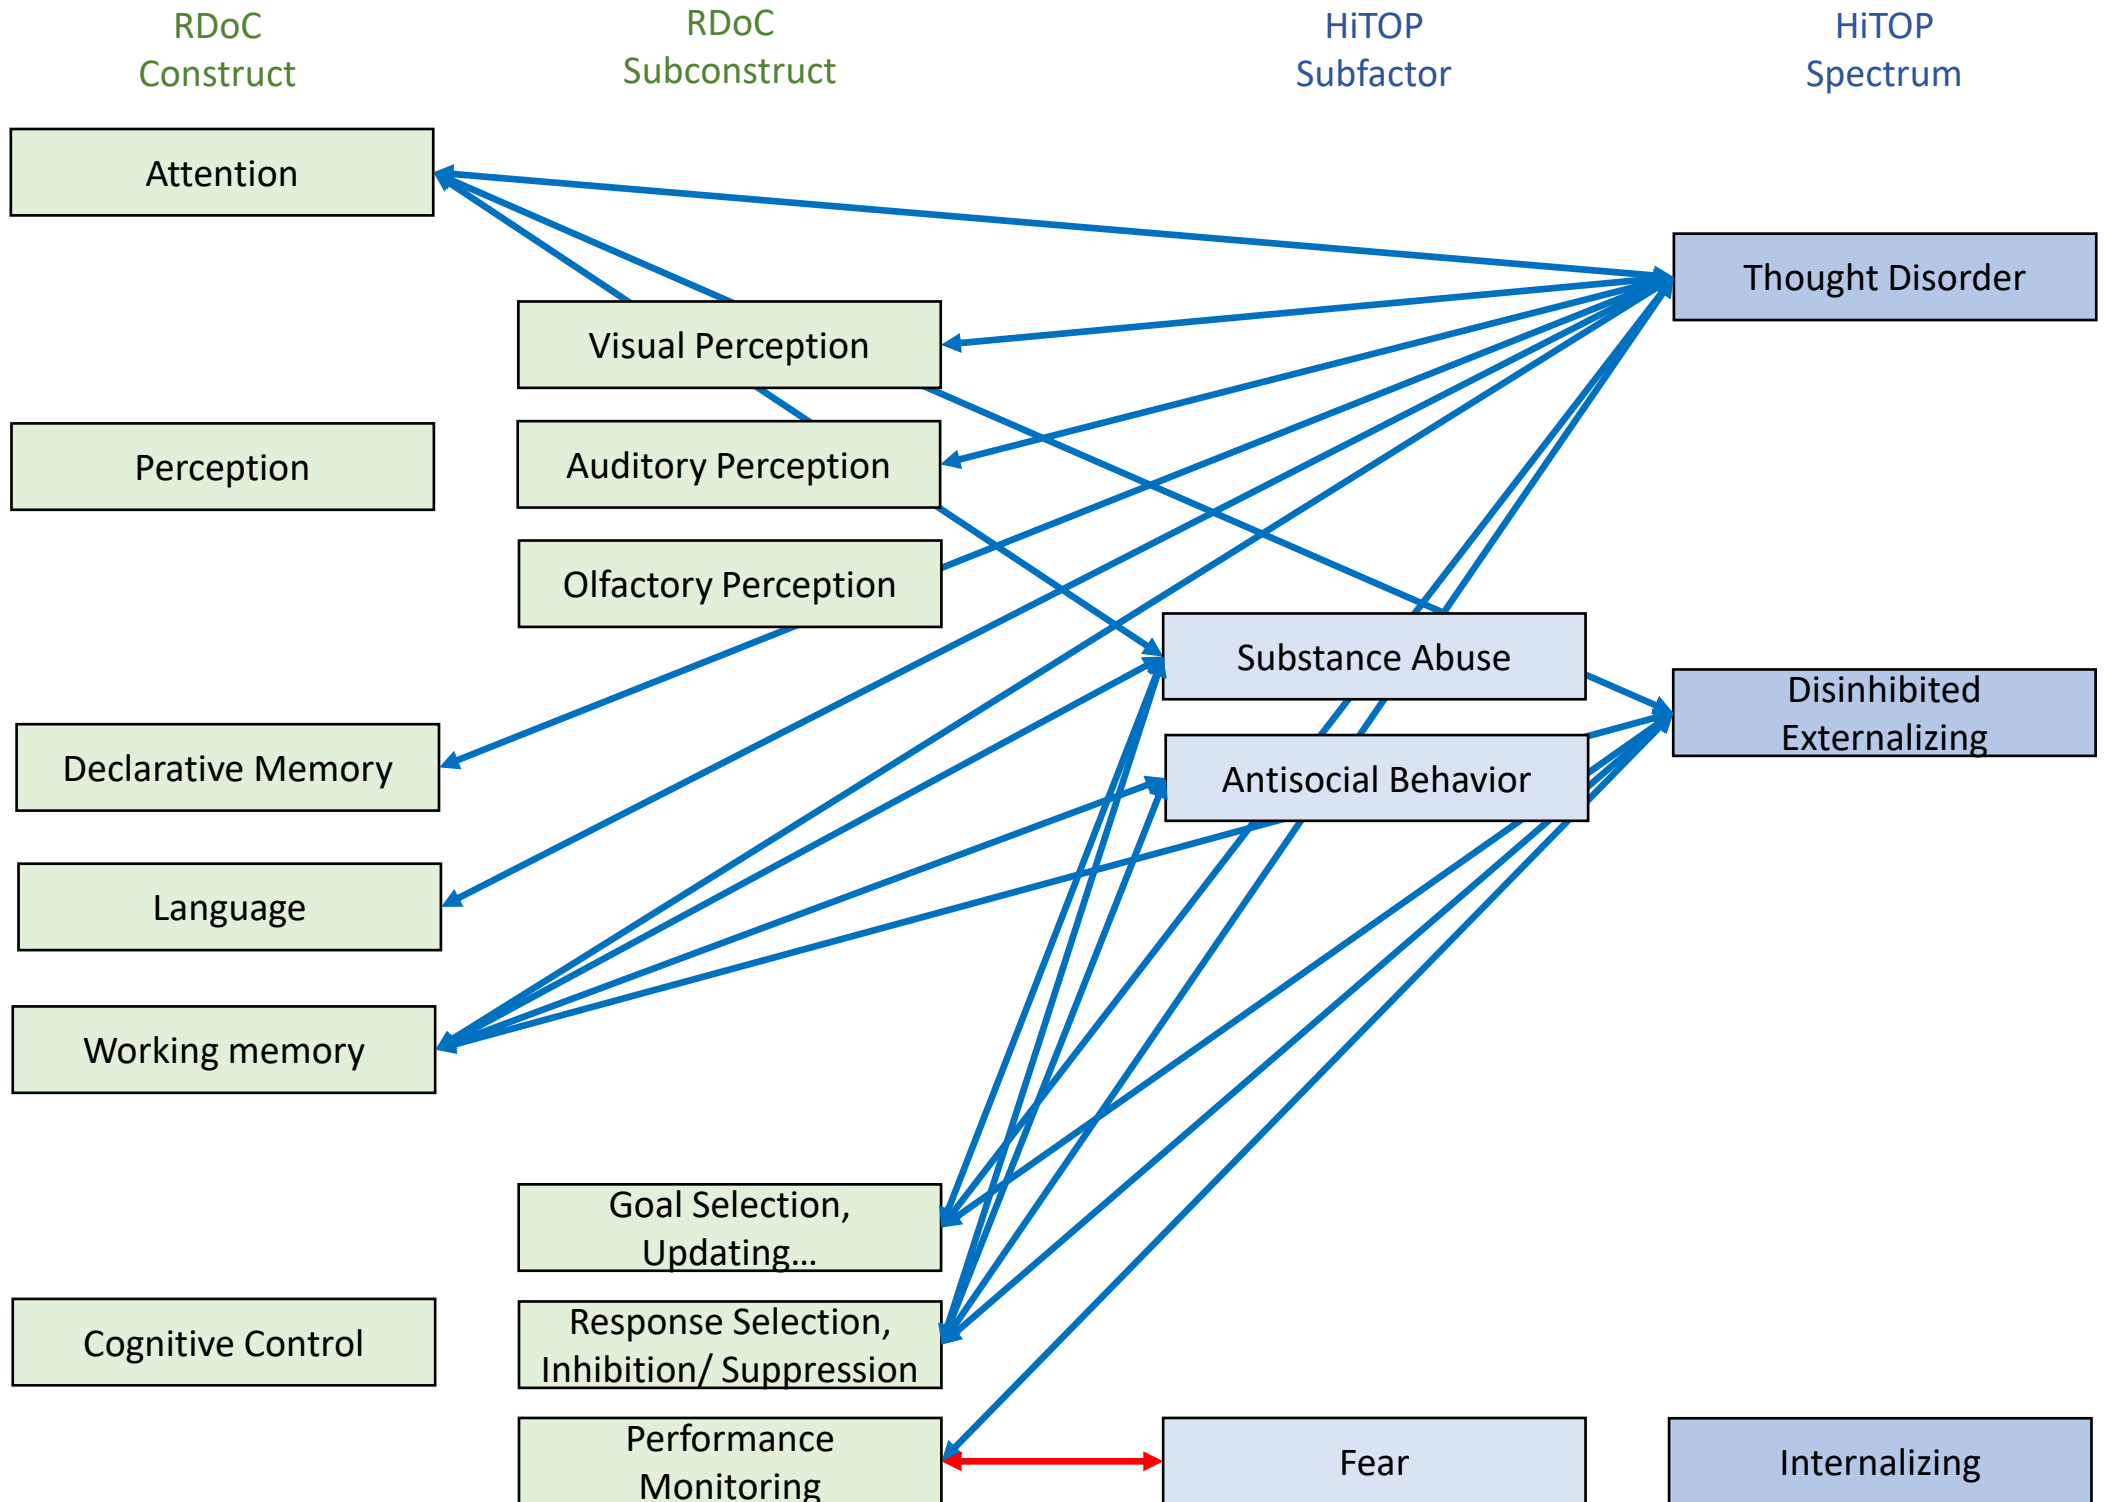

**Supplementary Figure 3. Top associations between the Research Domain Criteria (RDoC) Cognitive Systems and the Hierarchical Taxonomy of Psychopathology (HiTOP).**

Notes: Arrows show the most consistent associations between each RDoC construct/subconstruct and HiTOP spectra/subfactors. Details of associations that require further research are given in text. Red arrow = positive association; Blue arrow = negative association.

# Systems for Social Processes

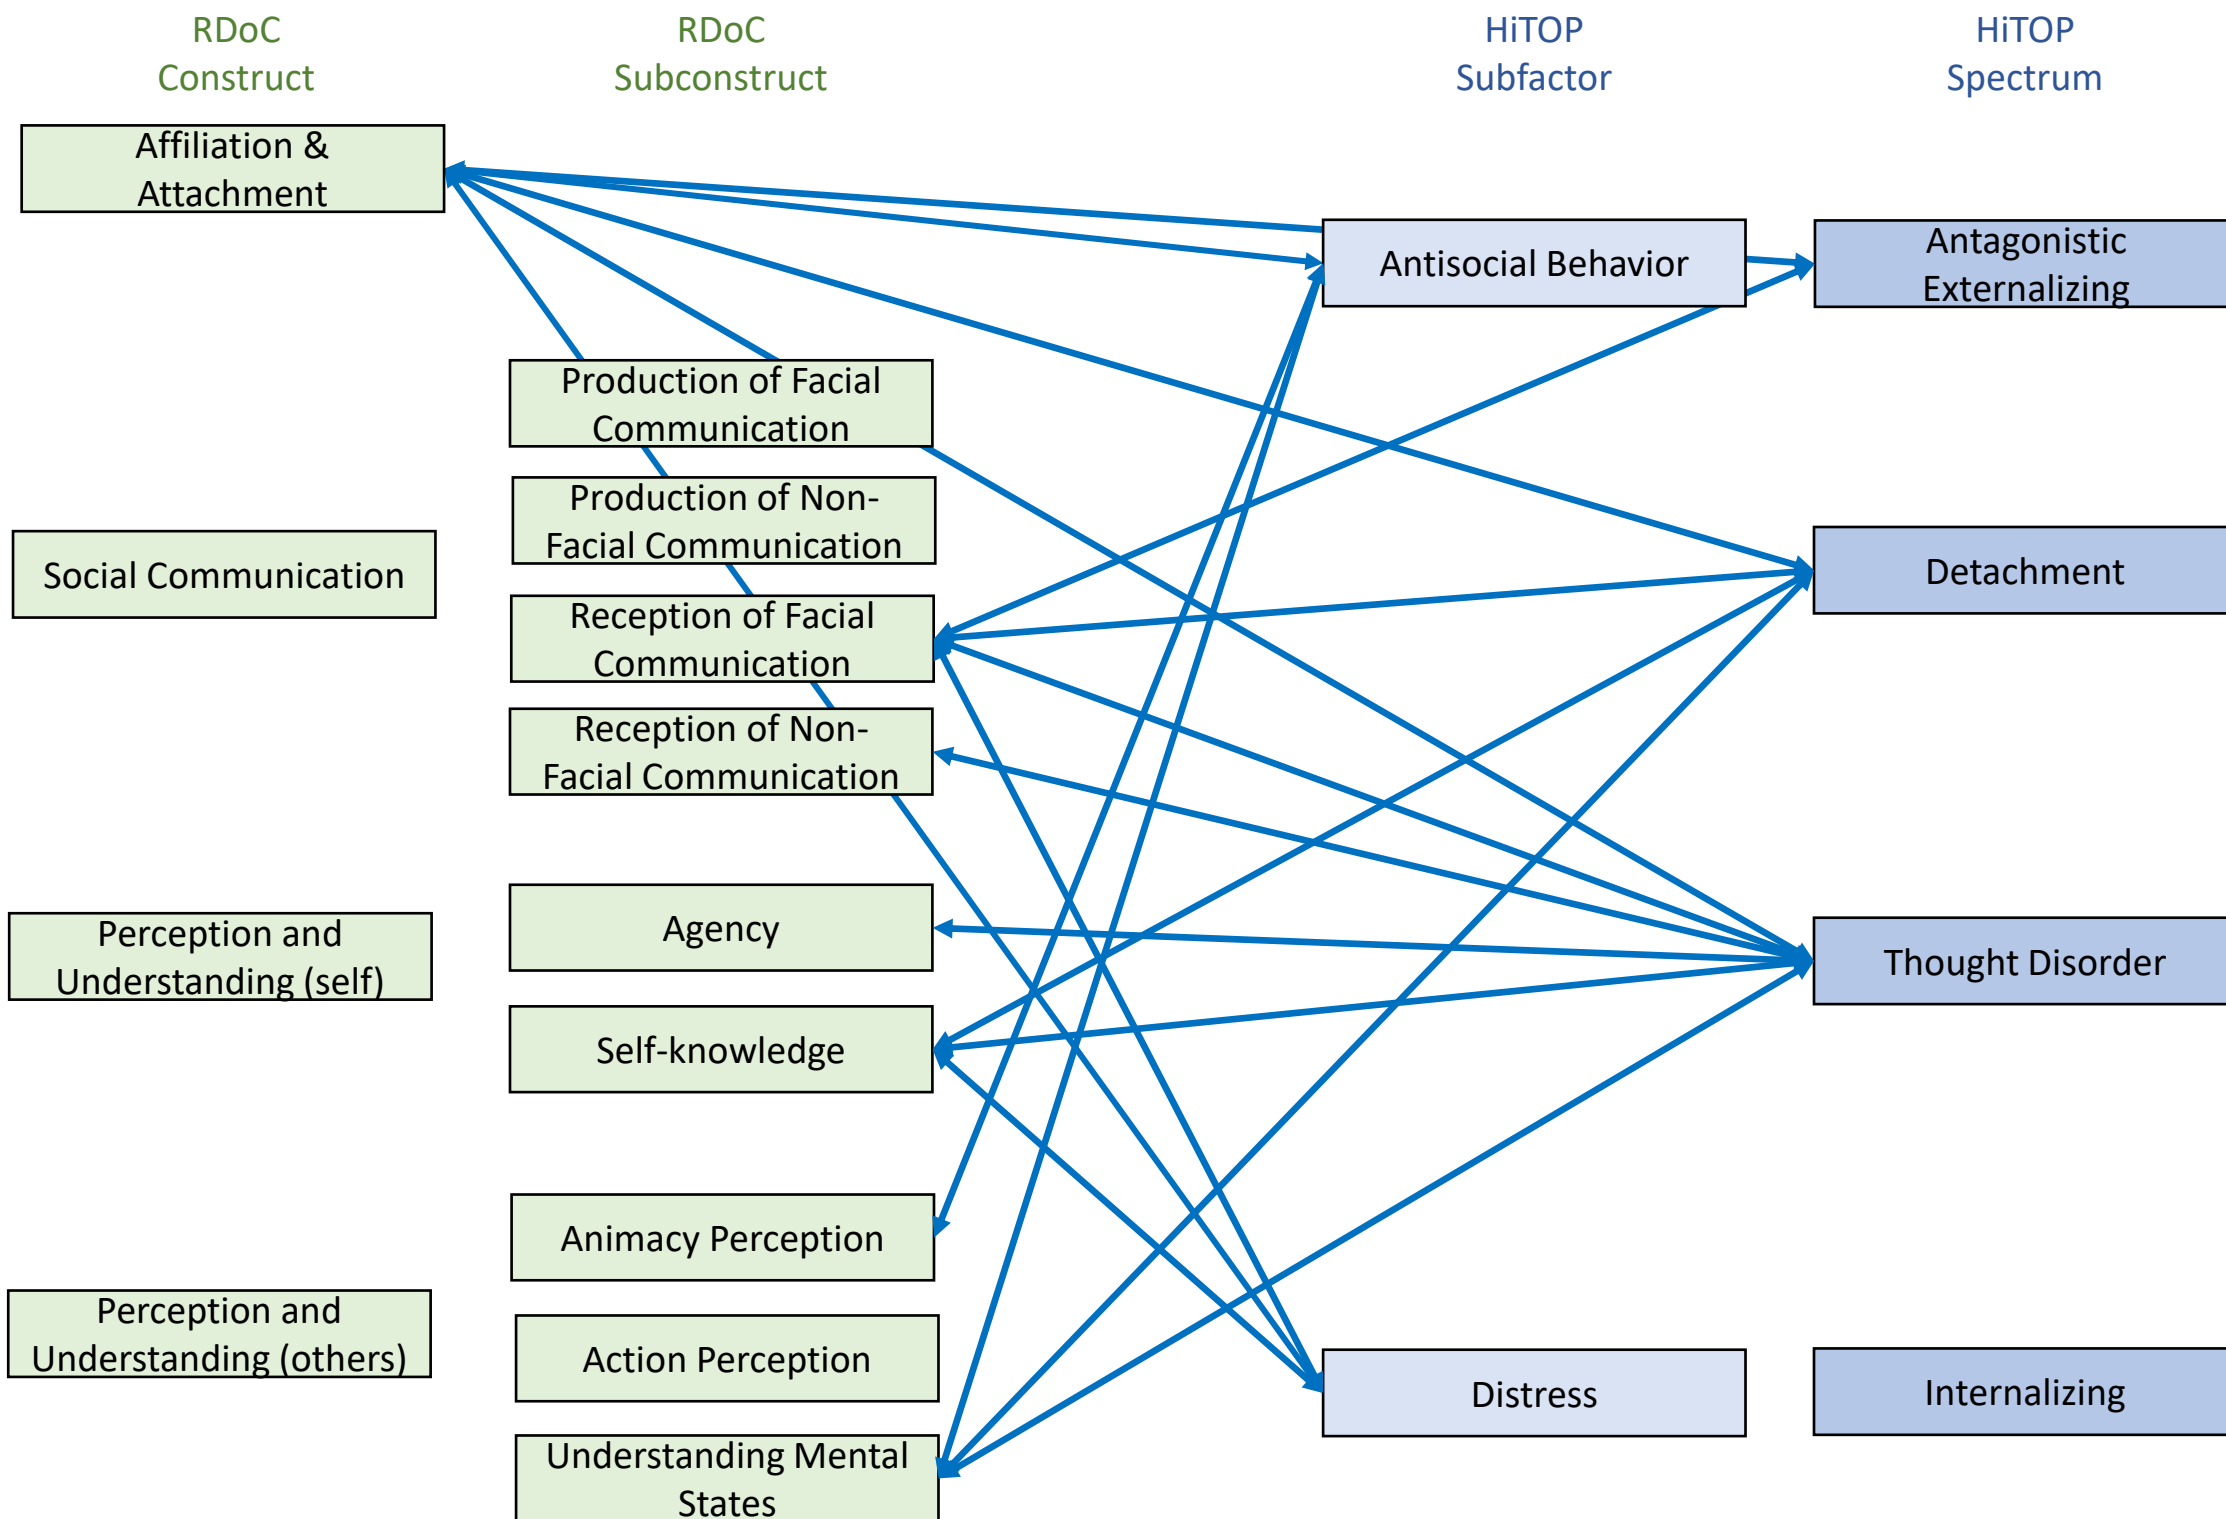

**Supplementary Figure 4. Top associations between the Research Domain Criteria (RDoC) Systems for Social processes and the Hierarchical Taxonomy of Psychopathology (HiTOP).**

Notes: Arrows show the most consistent associations between each RDoC construct/subconstruct and HiTOP spectra/subfactors. Details of associations that require further research are given in text. Blue arrow = negative association.

## Arousal & Regulatory Systems

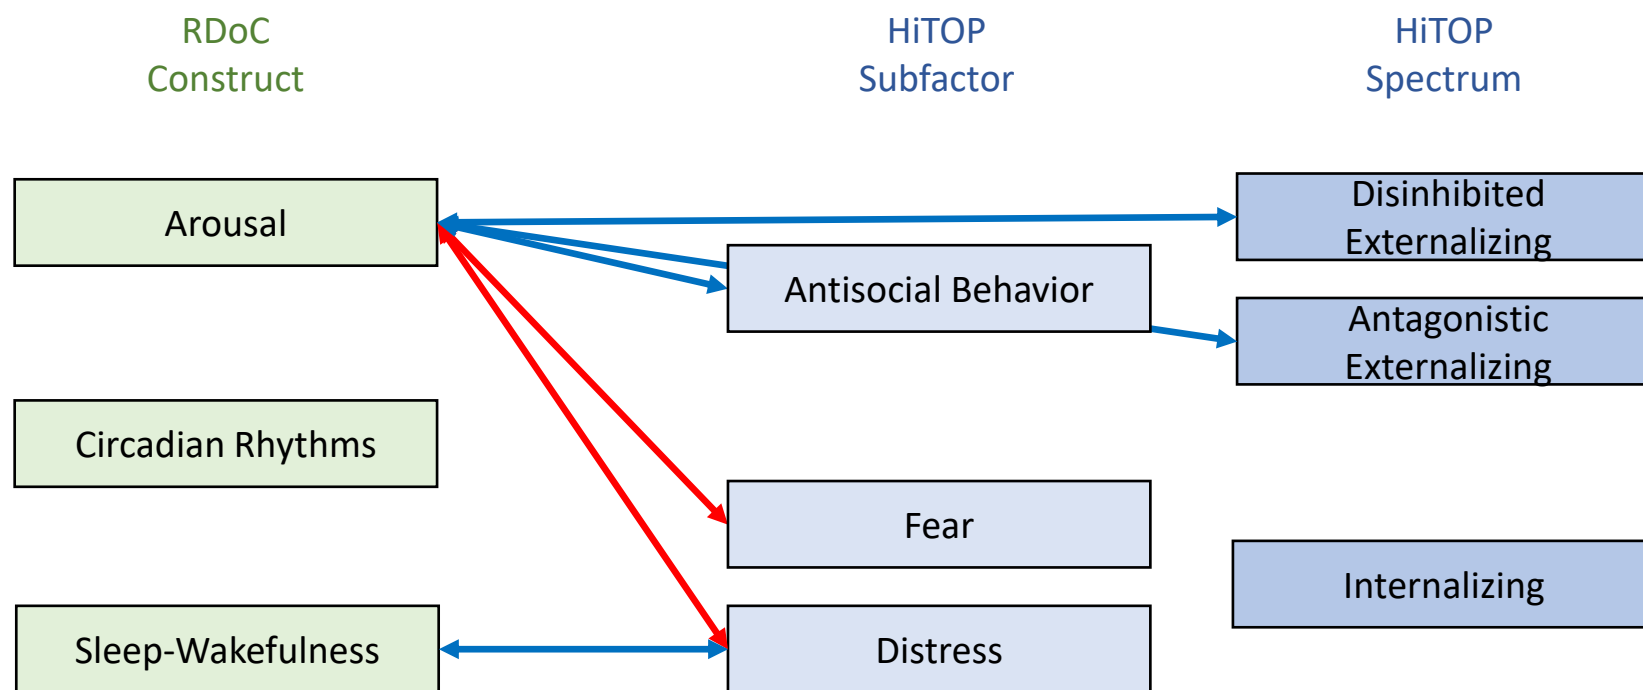

**Supplementary Figure 5. Top associations between the Research Domain Criteria (RDoC) Positive Valence Systems and the Hierarchical Taxonomy of Psychopathology (HiTOP).**

Notes: Arrows show the most consistent associations between each RDoC construct/subconstruct and HiTOP spectra/subfactors. Details of associations that require further research are given in text. Red arrow = positive association; Blue arrow = negative association.
